# Supplementary material for: The Giant HECT E3 Ubiquitin Ligase HERC1 Is Aberrantly Expressed in Myeloid Related Disorders and It Is a Novel BCR-ABL1 Binding Partner
Source: MDPI journal article supplement (doi:10.3390/cancers13020341), 2021-01-19
Supplement: s1 [file s1]

**Table S1: Chronic Myeloid Leukemia (CML) patient's characteristics.**

| ID | SEX | Age | Disease         | Type of Sample   | Bcr-Abl1 (p210) Copy No (IS) |
|----|-----|-----|-----------------|------------------|------------------------------|
| 1  | M   | 36  | CML (Diagnosis) | Bone Marrow      | 61.203                       |
| 2  | F   | 35  | CML (Diagnosis) | Bone Marrow      | 50.439                       |
| 3  | M   | 46  | CML (Diagnosis) | Bone Marrow      | 74.213                       |
| 4  | M   | 82  | CML (Diagnosis) | Bone Marrow      | 70.517                       |
| 5  | F   | 74  | CML (Diagnosis) | Bone Marrow      | 40.876                       |
| 6  | M   | 65  | CML (Diagnosis) | Bone Marrow      | 48.540                       |
| 7  | F   | 54  | CML (Diagnosis) | Bone Marrow      | 55.957                       |
| 8  | F   | 76  | CML (Diagnosis) | Bone Marrow      | 82.666                       |
| 9  | M   | 57  | CML (Diagnosis) | Bone Marrow      | 79.062                       |
| 10 | M   | 55  | CML (Diagnosis) | Bone Marrow      | 40.000                       |
| 11 | M   | 79  | CML (Diagnosis) | Bone Marrow      | 119.340                      |
| 12 | M   | 52  | CML (Diagnosis) | Bone Marrow      | 94.910                       |
| 13 | M   | 61  | CML (Diagnosis) | Bone Marrow      | 88.418                       |
| 14 | M   | 61  | CML (Diagnosis) | Bone Marrow      | 76.007                       |
| 15 | F   | 53  | CML (Diagnosis) | Bone Marrow      | 54.700                       |
| 16 | F   | 66  | CML (Diagnosis) | Bone Marrow      | 104.836                      |
| 17 | M   | 54  | CML (Diagnosis) | Bone Marrow      | 157.280                      |
| 18 | M   | 11  | CML (Diagnosis) | Bone Marrow      | 53.013                       |
| 19 | F   | 70  | CML (Diagnosis) | Bone Marrow      | 94.800                       |
| 20 | F   | 52  | CML (Diagnosis) | Bone Marrow      | 49.856                       |
| 21 | F   | 67  | CML (Diagnosis) | Bone Marrow      | 100.477                      |
| 22 | M   | 79  | CML (Diagnosis) | Bone Marrow      | 148.000                      |
| 23 | F   | 48  | CML (Diagnosis) | Bone Marrow      | 100.980                      |
| 24 | F   | 63  | CML (Diagnosis) | Bone Marrow      | 55.010                       |
| 25 | M   | 57  | CML (Diagnosis) | Bone Marrow      | 68.500                       |
| 26 | F   | 53  | CML (Diagnosis) | Bone Marrow      | 37.700                       |
| 27 | M   | 77  | CML (Diagnosis) | Bone Marrow      | 40.061                       |
| 28 | F   | 56  | CML (Diagnosis) | Bone Marrow      | 39.000                       |
| 29 | M   | 54  | CML (Diagnosis) | Bone Marrow      | 59.020                       |
| 30 | F   | 61  | CML (Diagnosis) | Bone Marrow      | 46.500                       |
| 31 | F   | 10  | CML (Diagnosis) | Bone Marrow      | 15.600                       |
| 32 | F   | 68  | CML (Diagnosis) | Bone Marrow      | 43.400                       |
| 33 | F   | 75  | CML (Diagnosis) | Bone Marrow      | 87.000                       |
| 34 | F   | 72  | CML (Diagnosis) | Bone Marrow      | 63.500                       |
| 35 | M   | 72  | CML (Diagnosis) | Bone Marrow      | 68.630                       |
| 36 | M   | 63  | CML (Diagnosis) | Peripheral Blood | 39.223                       |
| 37 | F   | 58  | CML (Diagnosis) | Peripheral Blood | 52.139                       |
| 38 | M   | 71  | CML (Diagnosis) | Peripheral Blood | 65.898                       |
| 39 | F   | 85  | CML (Diagnosis) | Peripheral Blood | 30.821                       |

|    |   |    |                 |                  |         |
|----|---|----|-----------------|------------------|---------|
| 40 | M | 48 | CML (Diagnosis) | Peripheral Blood | 74.544  |
| 41 | M | 82 | CML (Diagnosis) | Peripheral Blood | 97.660  |
| 42 | F | 74 | CML (Diagnosis) | Peripheral Blood | 51.951  |
| 43 | F | 76 | CML (Diagnosis) | Peripheral Blood | 80.899  |
| 44 | M | 20 | CML (Diagnosis) | Peripheral Blood | 26.395  |
| 45 | M | 15 | CML (Diagnosis) | Peripheral Blood | 135.310 |
| 46 | M | 56 | CML (Diagnosis) | Peripheral Blood | 85.735  |
| 47 | M | 57 | CML (Diagnosis) | Peripheral Blood | 80.013  |
| 48 | F | 57 | CML (Diagnosis) | Peripheral Blood | 42.000  |
| 49 | F | 26 | CML (Diagnosis) | Peripheral Blood | 44.000  |
| 50 | M | 66 | CML (Diagnosis) | Peripheral Blood | 59.972  |
| 51 | M | 79 | CML (Diagnosis) | Peripheral Blood | 158.590 |
| 52 | M | 52 | CML (Diagnosis) | Peripheral Blood | 112.800 |
| 53 | M | 61 | CML (Diagnosis) | Peripheral Blood | 100.000 |
| 54 | M | 61 | CML (Diagnosis) | Peripheral Blood | 72.772  |
| 55 | M | 54 | CML (Diagnosis) | Peripheral Blood | 137.000 |
| 56 | M | 11 | CML (Diagnosis) | Peripheral Blood | 57.729  |
| 57 | F | 70 | CML (Diagnosis) | Peripheral Blood | 193.500 |
| 58 | M | 45 | CML (Diagnosis) | Peripheral Blood | 58.001  |
| 59 | F | 52 | CML (Diagnosis) | Peripheral Blood | 48.335  |
| 60 | M | 37 | CML (Diagnosis) | Peripheral Blood | 53.736  |
| 61 | M | 67 | CML (Diagnosis) | Peripheral Blood | 98.500  |
| 62 | M | 79 | CML (Diagnosis) | Peripheral Blood | 93.350  |
| 63 | F | 48 | CML (Diagnosis) | Peripheral Blood | 102.350 |
| 64 | M | 54 | CML (Diagnosis) | Peripheral Blood | 57.200  |
| 65 | F | 74 | CML (Diagnosis) | Peripheral Blood | 48.100  |
| 66 | M | 71 | CML (Diagnosis) | Peripheral Blood | 70.500  |
| 67 | F | 72 | CML (Diagnosis) | Peripheral Blood | 82.970  |
| 68 | M | 50 | CML (Diagnosis) | Peripheral Blood | 93.900  |
| 69 | M | 36 | CML (Diagnosis) | Peripheral Blood | 38.200  |
| 70 | f | 83 | CML (Diagnosis) | Peripheral Blood | 79.000  |
| 71 | M | 54 | CML (Diagnosis) | Peripheral Blood | 86.200  |
| 72 | M | 77 | CML (Diagnosis) | Peripheral Blood | 74.130  |
| 73 | F | 40 | CML (relapse)   | Bone Marrow      | 12.979  |
| 74 | M | 76 | CML (Resistant) | Bone Marrow      | 18.032  |
| 75 | F | 44 | CML (relapse)   | Bone Marrow      | 28.094  |
| 76 | F | 42 | CML (Resistant) | Bone Marrow      | 25.597  |
| 77 | F | 31 | CML (relapse)   | Bone Marrow      | 14.383  |
| 78 | F | 79 | CML (relapse)   | Bone Marrow      | 58.691  |
| 79 | F | 83 | CML (relapse)   | Peripheral Blood | 21.246  |
| 80 | M | 89 | CML (relapse)   | Peripheral Blood | 47.862  |

|     |   |    |               |                  |       |
|-----|---|----|---------------|------------------|-------|
| 81  | M | 79 | CML Remission | Peripheral Blood | 0.500 |
| 82  | F | 68 | CML Remission | Peripheral Blood | 0.030 |
| 83  | M | 38 | CML Remission | Peripheral Blood | 0.005 |
| 84  | M | 76 | CML Remission | Peripheral Blood | 0.022 |
| 85  | M | 69 | CML Remission | Peripheral Blood | 0.524 |
| 86  | F | 79 | CML Remission | Peripheral Blood | 0.144 |
| 87  | F | 61 | CML Remission | Peripheral Blood | 0.392 |
| 88  | M | 34 | CML Remission | Peripheral Blood | 0.015 |
| 89  | M | 35 | CML Remission | Peripheral Blood | 0.004 |
| 90  | M | 62 | CML Remission | Peripheral Blood | 0.000 |
| 91  | M | 18 | CML Remission | Peripheral Blood | 0.289 |
| 92  | F | 61 | CML Remission | Peripheral Blood | 0.056 |
| 93  | F | 32 | CML Remission | Peripheral Blood | 0.934 |
| 94  | F | 54 | CML Remission | Peripheral Blood | 0.035 |
| 95  | M | 64 | CML Remission | Peripheral Blood | 0.000 |
| 96  | M | 73 | CML Remission | Peripheral Blood | 0.008 |
| 97  | M | 38 | CML Remission | Peripheral Blood | 0.090 |
| 98  | F | 68 | CML Remission | Peripheral Blood | 0.002 |
| 99  | F | 54 | CML Remission | Peripheral Blood | 2.900 |
| 100 | M | 48 | CML Remission | Peripheral Blood | 0.070 |
| 101 | F | 36 | CML Remission | Peripheral Blood | 0.000 |
| 102 | F | 70 | CML Remission | Peripheral Blood | 0.280 |
| 103 | F | 54 | CML Remission | Peripheral Blood | 0.035 |
| 104 | F | 44 | CML Remission | Peripheral Blood | 0.025 |
| 105 | M | 57 | CML Remission | Peripheral Blood | 0.980 |
| 106 | F | 65 | CML Remission | Peripheral Blood | 0.006 |
| 107 | M | 80 | CML Remission | Peripheral Blood | 0.080 |
| 108 | M | 12 | CML Remission | Peripheral Blood | 0.010 |
| 109 | F | 63 | CML Remission | Peripheral Blood | 1.000 |
| 110 | F | 66 | CML Remission | Peripheral Blood | 0.700 |
| 111 | F | 60 | CML Remission | Peripheral Blood | 0.000 |
| 112 | F | 39 | CML Remission | Bone Marrow      | 1.072 |
| 113 | M | 49 | CML Remission | Bone Marrow      | 0.060 |
| 114 | F | 54 | CML Remission | Peripheral Blood | 0.020 |
| 115 | M | 62 | CML Remission | Peripheral Blood | 0.060 |
| 116 | F | 58 | CML Remission | Peripheral Blood | 0.081 |
| 117 | M | 57 | CML Remission | Peripheral Blood | 0.008 |
| 118 | F | 20 | CML Remission | Peripheral Blood | 0.100 |
| 119 | F | 75 | CML Remission | Peripheral Blood | 0.000 |
| 120 | F | 74 | CML Remission | Peripheral Blood | 0.057 |
| 121 | M | 39 | CML Remission | Peripheral Blood | 1.250 |

|     |   |    |               |                  |       |
|-----|---|----|---------------|------------------|-------|
| 122 | f | 87 | CML Remission | Peripheral Blood | 0.000 |
| 123 | M | 56 | CML Remission | Peripheral Blood | 0.093 |
| 124 | M | 61 | CML Remission | Peripheral Blood | 0.000 |
| 125 | F | 54 | CML Remission | Peripheral Blood | 0.280 |

**Table S2: Characteristics of Acute Myeloid Leukemia (AML) patient's at diagnosis.**

| ID | Sex | Age | Disease         | Type of Sample | Genetic Alteration |
|----|-----|-----|-----------------|----------------|--------------------|
| 1  | F   | 58  | AML (Diagnosis) | Bone Marrow    | inv16              |
| 2  | M   | 63  | AML (Diagnosis) | Bone Marrow    | inv16              |
| 3  | m   | 38  | AML (Diagnosis) | Bone Marrow    | inv16              |
| 4  | M   | 6   | AML (Diagnosis) | Bone Marrow    | inv16              |
| 5  | M   | 71  | AML (Diagnosis) | Bone Marrow    | inv16              |
| 6  | M   | 42  | AML (Diagnosis) | Bone Marrow    | inv16              |
| 7  | F   | 57  | AML (Diagnosis) | Bone Marrow    | inv16              |
| 8  | M   | 64  | AML (Diagnosis) | Bone Marrow    | inv16              |
| 9  | F   | 58  | AML (Diagnosis) | Bone Marrow    | inv16              |
| 10 | M   | 64  | AML (Diagnosis) | Bone Marrow    | t (8;21)           |
| 11 | M   | 51  | AML (Diagnosis) | Bone Marrow    | t (8;21)           |
| 12 | M   | 38  | AML (Diagnosis) | Bone Marrow    | t (8;21)           |
| 13 | M   | 33  | AML (Diagnosis) | Bone Marrow    | t (8;21)           |
| 14 | M   | 29  | AML (Diagnosis) | Bone Marrow    | t (8;21)           |
| 15 | M   | 63  | AML (Diagnosis) | Bone Marrow    | t (8;21)           |
| 16 | M   | 34  | AML (Diagnosis) | Bone Marrow    | t(8;21)            |
| 17 | M   | 75  | AML (Diagnosis) | Bone Marrow    | t (8;21)           |
| 18 | M   | 31  | AML (Diagnosis) | Bone Marrow    | t (8;21)           |
| 19 | M   | 73  | AML (Diagnosis) | Bone Marrow    | IDH2 R140Q         |
| 20 | M   | 55  | AML (Diagnosis) | Bone Marrow    | IDH2 R140Q         |
| 21 | m   | 84  | AML (Diagnosis) | Bone Marrow    | IDH2 R140Q         |
| 22 | F   | 82  | AML (Diagnosis) | Bone Marrow    | IDH2 R140Q         |
| 23 | M   | 79  | AML (Diagnosis) | Bone Marrow    | IDH2 R140Q         |
| 24 | M   | 57  | AML (Diagnosis) | Bone Marrow    | NPM1               |
| 25 | F   | 78  | AML (Diagnosis) | Bone Marrow    | NPM1               |
| 26 | M   | 64  | AML (Diagnosis) | Bone Marrow    | NPM1               |
| 27 | M   | 74  | AML (Diagnosis) | Bone Marrow    | NPM1               |
| 28 | F   | 76  | AML (Diagnosis) | Bone Marrow    | NPM1               |
| 29 | F   | 22  | AML (Diagnosis) | Bone Marrow    | NPM1               |
| 30 | F   | 69  | AML (Diagnosis) | Bone Marrow    | NPM1               |
| 31 | F   | 51  | AML (Diagnosis) | Bone Marrow    | NPM1               |
| 32 | M   | 91  | AML (Diagnosis) | Bone Marrow    | FLT3 ITD           |
| 33 | M   | 75  | AML (Diagnosis) | Bone Marrow    | FLT3 ITD           |
| 34 | F   | 67  | AML (Diagnosis) | Bone Marrow    | FLT-3 15% COD. 835 |

|    |   |    |                 |             |                    |
|----|---|----|-----------------|-------------|--------------------|
| 35 | F | 77 | AML (Diagnosis) | Bone Marrow | FLT-3 ITD          |
| 36 | F | 53 | AML (Diagnosis) | Bone Marrow | FLT-3 ITD          |
| 37 | M | 36 | AML (Diagnosis) | Bone Marrow | FLT-3 ITD          |
| 38 | M | 48 | AML (Diagnosis) | Bone Marrow | FLT-3 ITD          |
| 39 | M | 41 | AML (Diagnosis) | Bone Marrow | FLT-3 ITD          |
| 40 | M | 59 | AML (Diagnosis) | Bone Marrow | FLT-3 ITD          |
| 41 | F | 58 | AML (Diagnosis) | Bone Marrow | FLT-3 ITD/inv16    |
| 42 | M | 41 | AML (Diagnosis) | Bone Marrow | FLT-3 ITD/t(15;17) |
| 43 | F | 81 | AML (Diagnosis) | Bone Marrow | NPM1-FLT3 ITD      |
| 44 | F | 88 | AML (Diagnosis) | Bone Marrow | NPM1-FLT3 ITD      |
| 45 | F | 52 | AML (Diagnosis) | Bone Marrow | FLT3 ITD           |
| 46 | M | 46 | AML (Diagnosis) | Bone Marrow | FLT3 ITD           |
| 47 | M | 47 | AML (Diagnosis) | Bone Marrow | FLT3 ITD           |
| 48 | F | 38 | AML (Diagnosis) | Bone Marrow | No                 |
| 49 | M | 56 | AML (Diagnosis) | Bone Marrow | No                 |
| 50 | M | 18 | AML (Diagnosis) | Bone Marrow | No                 |
| 51 | F | 66 | AML (Diagnosis) | Bone Marrow | No                 |
| 52 | M | 73 | AML (Diagnosis) | Bone Marrow | No                 |
| 53 | F | 82 | AML (Diagnosis) | Bone Marrow | No                 |
| 54 | F | 78 | AML (Diagnosis) | Bone Marrow | No                 |
| 55 | M | 30 | AML (Diagnosis) | Bone Marrow | No                 |
| 56 | M | 72 | AML (Diagnosis) | Bone Marrow | No                 |
| 57 | M | 57 | AML (Diagnosis) | Bone Marrow | No                 |
| 58 | M | 35 | AML (Diagnosis) | Bone Marrow | No                 |
| 59 | M | 65 | AML (Diagnosis) | Bone Marrow | No                 |
| 60 | M | 40 | AML (Diagnosis) | Bone Marrow | No                 |
| 61 | F | 61 | AML (Diagnosis) | Bone Marrow | No                 |
| 62 | M | 76 | AML (Diagnosis) | Bone Marrow | No                 |
| 63 | F | 68 | AML (Diagnosis) | Bone Marrow | t(15;17)PML/RARA   |
| 64 | F | 64 | AML (Diagnosis) | Bone Marrow | t(15;17)PML/RARA   |
| 65 | M | 68 | AML (Diagnosis) | Bone Marrow | t(15;17)PML/RARA   |
| 66 | F | 79 | AML (Diagnosis) | Bone Marrow | t(15;17)PML/RARA   |
| 67 | M | 41 | AML (Diagnosis) | Bone Marrow | FLT-3 ITD/t(15;17) |
| 68 | M | 41 | AML (Diagnosis) | Bone Marrow | t(15;17)PML/RARA   |
| 69 | F | 79 | AML (Diagnosis) | Bone Marrow | t(15;17)PML/RARA   |
| 70 | F | 34 | AML (Diagnosis) | Bone Marrow | t(15;17)PML/RARA   |
| 71 | M | 85 | AML (Diagnosis) | Bone Marrow | t(15;17)PML/RARA   |
| 72 | F | 59 | AML (Diagnosis) | Bone Marrow | t(15;17)PML/RARA   |
| 73 | M | 56 | AML (Diagnosis) | Bone Marrow | t(15;17)PML/RARA   |
| 74 | M | 38 | AML (Diagnosis) | Bone Marrow | t(15;17)PML/RARA   |
| 75 | M | 74 | AML (Diagnosis) | Bone Marrow | t(15;17)PML/RARA   |
| 76 | F | 40 | AML (Diagnosis) | Bone Marrow | t(15;17)PML/RARA   |
| 77 | F | 79 | AML (Diagnosis) | Bone Marrow | NPM1-FLT3 835      |
| 78 | F | 70 | AML (Diagnosis) | Bone Marrow | NPM1-FLT3 835      |
| 79 | M | 68 | AML (Diagnosis) | Bone Marrow | NPM1-FLT3 835      |
| 80 | M | 76 | AML (Diagnosis) | Bone Marrow | NPM1-FLT3 835      |

|    |   |    |                 |                  |                    |
|----|---|----|-----------------|------------------|--------------------|
| 81 | M | 79 | AML (Diagnosis) | Peripheral Blood | inv16              |
| 82 | M | 51 | AML (Diagnosis) | Peripheral Blood | inv16              |
| 83 | m | 57 | AML (Diagnosis) | Peripheral Blood | inv16              |
| 84 | F | 34 | AML (Diagnosis) | Peripheral Blood | inv16              |
| 85 | F | 87 | AML (Diagnosis) | Peripheral Blood | t(8;21)            |
| 86 | F | 51 | AML (Diagnosis) | Peripheral Blood | t(8;21)            |
| 87 | M | 55 | AML (Diagnosis) | Peripheral Blood | IDH2 R140Q         |
| 88 | F | 51 | AML (Diagnosis) | Peripheral Blood | NPM1               |
| 89 | F | 24 | AML (Diagnosis) | Peripheral Blood | NPM1               |
| 90 | F | 51 | AML (Diagnosis) | Peripheral Blood | FLT-3 ITD/t(15;17) |
| 91 | F | 80 | AML (Diagnosis) | Peripheral Blood | FLT-3 ITD          |
| 92 | F | 51 | AML (Diagnosis) | Peripheral Blood | FLT-3 ITD/t(15;17) |
| 93 | M | 55 | AML (Diagnosis) | Peripheral Blood | IDH2 R140Q         |
| 94 | F | 88 | AML (Diagnosis) | Peripheral Blood | NPM1-FLT3 835      |
| 95 | F | 51 | AML (Diagnosis) | Peripheral Blood | FLT-3 ITD          |
| 96 | F | 75 | AML (Diagnosis) | Peripheral Blood | IDH2 & IDH1        |
| 97 | M | 37 | AML (Diagnosis) | Peripheral Blood | t(8;21)            |

**Table S3: Details of MyeloProliferative Neoplasms (MPNs) patients.**

| ID | Sex | Age (aa) | Disease        | BM/PB | Mutation              |
|----|-----|----------|----------------|-------|-----------------------|
| 1  | M   | 87       | ET (Diagnosis) | PB    | CARL-type 2           |
| 2  | F   | 53       | ET (Diagnosis) | PB    | CARL-type 1           |
| 3  | F   | 68       | ET (Diagnosis) | PB    | CARL-type 1           |
| 4  | M   | 57       | ET (Diagnosis) | PB    | CARL-type 1           |
| 5  | M   | 55       | ET (Diagnosis) | PB    | CARL-type 1           |
| 6  | M   | 53       | ET (Diagnosis) | PB    | CARL-type 1           |
| 7  | F   | 70       | ET (Diagnosis) | PB    | CARL-type 1           |
| 8  | M   | 59       | ET (Diagnosis) | PB    | CARL-type 1           |
| 9  | M   | 48       | ET (Diagnosis) | PB    | CARL-type 9           |
| 10 | M   | 64       | ET (Diagnosis) | PB    | CARL-type 1           |
| 11 | M   | 47       | ET (Diagnosis) | PB    | CARL-type 2           |
| 12 | M   | 50       | ET (Diagnosis) | PB    | CARL-type 4           |
| 13 | M   | 83       | ET (Diagnosis) | PB    | CARL-type 1           |
| 14 | M   | 62       | ET (Diagnosis) | PB    | CARL-type 2           |
| 15 | F   | 54       | ET (Diagnosis) | PB    | CARL-type 2           |
| 16 | F   | 57       | ET (Diagnosis) | PB    | CARL-type 1           |
| 17 | F   | 82       | ET (Diagnosis) | PB    | JAK2 <sup>V617F</sup> |
| 18 | M   | 47       | ET (Diagnosis) | PB    | JAK2 <sup>V617F</sup> |
| 19 | M   | 78       | ET (Diagnosis) | PB    | JAK2 <sup>V617F</sup> |
| 20 | F   | 49       | ET (Diagnosis) | PB    | JAK2 <sup>V617F</sup> |

|    |   |    |                 |    |                       |
|----|---|----|-----------------|----|-----------------------|
| 21 | M | 63 | ET (Diagnosis)  | PB | JAK2 <sup>V617F</sup> |
| 22 | M | 19 | ET (Diagnosis)  | PB | JAK2 <sup>V617F</sup> |
| 23 | F | 65 | ET (Diagnosis)  | PB | JAK2 <sup>V617F</sup> |
| 24 | F | 59 | ET (Diagnosis)  | PB | w.t.                  |
| 25 | F | 42 | ET (Diagnosis)  | PB | NR                    |
| 26 | F | 82 | ET (Diagnosis)  | PB | w.t.                  |
| 27 | M | 59 | ET (Diagnosis)  | PB | w.t.                  |
| 28 | F | 70 | ET (Diagnosis)  | PB | w.t.                  |
| 29 | F | 75 | ET (Diagnosis)  | PB | w.t.                  |
| 30 | M | 57 | ET (Diagnosis)  | PB | w.t.                  |
| 31 | M | 64 | ET (Diagnosis)  | PB | w.t.                  |
| 32 | M | 53 | ET (Diagnosis)  | PB | w.t.                  |
| 33 | M | 75 | ET (Diagnosis)  | PB | w.t.                  |
| 34 | M | 51 | ET (Diagnosis)  | PB | w.t.                  |
| 35 | F | 52 | ET (Diagnosis)  | PB | NR                    |
| 36 | F | 70 | ET (Diagnosis)  | PB | w.t.                  |
| 37 | F | 27 | ET (Diagnosis)  | PB | w.t.                  |
| 38 | F | 55 | ET (Diagnosis)  | PB | NR                    |
| 39 | M | 92 | ET (Diagnosis)  | PB | w.t.                  |
| 40 | M | 77 | PV (Diagnosis)  | PB | JAK2 <sup>V617F</sup> |
| 41 | M | 49 | PV (Diagnosis)  | PB | JAK2 <sup>V617F</sup> |
| 42 | M | 84 | PV (Diagnosis)  | PB | JAK2 <sup>V617F</sup> |
| 43 | F | 37 | PV (Diagnosis)  | PB | JAK2 <sup>V617F</sup> |
| 44 | F | 77 | PV (Diagnosis)  | PB | JAK2 <sup>V617F</sup> |
| 45 | M | 56 | PV (Diagnosis)  | PB | JAK2 <sup>V617F</sup> |
| 46 | F | 89 | PV (Diagnosis)  | PB | JAK2 <sup>V617F</sup> |
| 47 | F | 60 | PV (Diagnosis)  | PB | JAK2 <sup>V617F</sup> |
| 48 | F | 84 | PV (Diagnosis)  | PB | JAK2 <sup>V617F</sup> |
| 49 | S | 38 | PV (Diagnosis)  | PB | JAK2 <sup>V617F</sup> |
| 50 | M | 69 | PV (Diagnosis)  | PB | JAK2 <sup>V617F</sup> |
| 51 | M | 69 | PV (Diagnosis)  | PB | w.t.                  |
| 52 | M | 64 | PV (Diagnosis)  | PB | w.t.                  |
| 53 | M | 45 | PV (Diagnosis)  | PB | w.t.                  |
| 54 | M | 58 | PV (Diagnosis)  | PB | w.t.                  |
| 55 | M | 66 | PV (Diagnosis)  | PB | w.t.                  |
| 56 | M | 28 | PV (Diagnosis)  | PB | w.t.                  |
| 57 | M | 72 | PV (Diagnosis)  | PB | w.t.                  |
| 58 | M | 74 | PV (Diagnosis)  | PB | w.t.                  |
| 59 | M | 65 | PV (Diagnosis)  | PB | w.t.                  |
| 60 | M | 47 | PV (Diagnosis)  | PB | w.t.                  |
| 61 | M | 80 | PMF (Diagnosis) | PB | JAK2 <sup>V617F</sup> |
| 62 | M | 69 | PMF (Diagnosis) | PB | JAK2 <sup>V617F</sup> |
| 63 | F | 85 | PMF (Diagnosis) | PB | JAK2 <sup>V617F</sup> |
| 64 | M | 78 | PMF (Diagnosis) | PB | JAK2 <sup>V617F</sup> |

|    |   |    |                 |    |                       |
|----|---|----|-----------------|----|-----------------------|
| 65 | M | 60 | PMF (Diagnosis) | PB | JAK2 <sup>V617F</sup> |
| 66 | F | 76 | PMF (Diagnosis) | PB | JAK2 <sup>V617F</sup> |
| 67 | F | 67 | PMF (Diagnosis) | PB | JAK2 <sup>V617F</sup> |
| 68 | M | 77 | PMF (Diagnosis) | PB | w.t.                  |
| 69 | F | 84 | PMF (Diagnosis) | PB | NR                    |
| 70 | M | 42 | PMF (Diagnosis) | PB | w.t.                  |
| 71 | M | 39 | PMF (Diagnosis) | PB | w.t.                  |
| 72 | M | 47 | PMF (Diagnosis) | PB | w.t.                  |
| 73 | F | 60 | PMF (Diagnosis) | PB | w.t.                  |
| 74 | M | 40 | PMF (Diagnosis) | PB | w.t.                  |
| 75 | F | 73 | PMF (Diagnosis) | PB | w.t.                  |
| 76 | F | 78 | PMF (Diagnosis) | PB | w.t.                  |
| 77 | F | 78 | PMF (Diagnosis) | PB | w.t.                  |
| 78 | F | 68 | PMF (Diagnosis) | PB | w.t.                  |

**Table S4:** (expressed either as median value and as range) of the AML patients enrolled in the study.  
**ITD:** Internal Tandem Duplication; **y:** years; **n:** number of patients

| Mutation free<br>(n=15)                    | NPM-FT3<br>D835 (n=5)                      | t(15;17)<br>(n=14)                         | IDH2 R <sup>140Q</sup><br>(n=5)            | t(8;21) (n=9)                              | FLT3 ITD<br>(n=14)                         | inv16 (n=9)                                | NPM1 (n=10)                                |
|--------------------------------------------|--------------------------------------------|--------------------------------------------|--------------------------------------------|--------------------------------------------|--------------------------------------------|--------------------------------------------|--------------------------------------------|
| <i>Median:</i> 68 y<br><i>Range:</i> 23÷83 | <i>Median:</i> 75 y<br><i>Range:</i> 51÷90 | <i>Median:</i> 67 y<br><i>Range:</i> 39÷84 | <i>Median:</i> 64 y<br><i>Range:</i> 64÷75 | <i>Median:</i> 54 y<br><i>Range:</i> 36÷89 | <i>Median:</i> 58 y<br><i>Range:</i> 41÷92 | <i>Median:</i> 60 y<br><i>Range:</i> 45÷63 | <i>Median:</i> 55 y<br><i>Range:</i> 26÷68 |
